# Supplementary material for: Association between tumor necrosis factor-α and chronic obstructive pulmonary disease: a systematic review and meta-analysis
Source: PubMed Central journal article supplement — Ther Adv Respir Dis. 2019 Aug 8;13:1753466619866096. doi: 10.1177/1753466619866096 (PMC6688146; doi:10.1177/1753466619866096), 2019-08-08
Supplement: Supplementary_Table_S1.pdf [file Supplementary_Table_S1.pdf]

## Supplementary Table S1. Search Strategies

### Search strategy in PubMed

- #1 acceleromet\*[Text Word]OR actimeter[Text Word]OR actigraph[Text Word]OR  
actiwatch[Text Word] OR GT3X[Text Word] OR pedomet\*[Text Word]OR  
(activity monitor)[Text Word]OR (step count\*)[Text Word] OR (step  
sensor)[Text Word]OR (step meter)[Text Word]
- #2 (pulmonary disease, chronic obstructive)[MeSH Terms]OR (lung diseases,  
obstructive)[MeSH Terms]OR (pulmonary emphysema)[MeSH Terms]OR  
(bronchitis, chronic)[MeSH Terms]OR (obstructive lung disease)[Text Word]OR  
(chronic obstructive lung disease)[Text Word]OR (chronic obstructive airways  
disease)[Text Word]OR (chronic airways limitation)[Text Word]OR (chronic  
airways obstruction)[Text Word] OR copd[Text Word] OR coad[Text Word]OR  
cobd[Text Word] OR aecd[Text Word] AND (Tumor necrosis factor-a) [MeSH  
Terms] OR (TNF-a)[Title/Abstract/Keywords]
- #3 #1 AND #2
- #4 #3 Filter: Publication date to March22, 2019

### Search strategy in the Cochrane Library

- #1 acceleromet\*[Title/Abstract/Keywords]OR  
actimeter[Title/Abstract/Keywords]OR actigraph[Title/Abstract/Keywords]OR  
actiwatch[Title/Abstract/Keywords] OR GT3X[Title/Abstract/Keywords] OR  
pedomet\*[Title/Abstract/Keywords]OR (activity  
monitor)[Title/Abstract/Keywords]OR (step count\*)[Title/Abstract/Keywords]  
OR (step sensor)[Title/Abstract/Keywords]OR (step  
meter)[Title/Abstract/Keywords]
- #2 (pulmonary disease, chronic obstructive)[MeSH Terms]OR (lung diseases,  
obstructive)[MeSH Terms]OR (pulmonary emphysema)[MeSH Terms]OR  
(bronchitis, chronic)[MeSH Terms]OR (obstructive lung  
disease)[Title/Abstract/Keywords]OR(chronic obstructive lung  
disease)[Title/Abstract/Keywords]OR (chronic obstructive airways

disease)[Title/Abstract/Keywords]OR (chronic airways  
limitation)[Title/Abstract/Keywords]OR (chronic airways  
obstruction)[Title/Abstract/Keywords] OR copd[Title/Abstract/Keywords] OR  
coad[Title/Abstract/Keywords]OR cobd[Title/Abstract/Keywords] OR  
aecd[Title/Abstract/Keywords] AND (Tumor necrosis factor-a) [MeSH Terms]  
OR (TNF-a)[Title/Abstract/Keywords]

#3 #1 AND #2

#4 #3Filter: Publication date to May22, 2017
